# Supplementary material for: Zinc(ii) and cadmium(ii) amorphous metal–organic frameworks (aMOFs): study of activation process and high-pressure adsorption of greenhouse gases
Source: Royal Society of Chemistry journal article supplement (doi:10.1039/d1ra02938j), 2021-01-01
Supplement: d1ra02938j1.pdf [file d1ra02938j1.pdf]

# ELECTRONIC SUPPLEMENTARY MATERIAL

## Zinc(II) and Cadmium(II) Amorphous Metal-Organic Frameworks (aMOFs): Study of Activation Process and High-pressure Adsorption of Greenhouse Gases

Miroslav Almáši<sup>a\*</sup>, Nikolas Király<sup>a</sup>, Vladimír Zelenák<sup>a</sup>, Mária Vilková<sup>b</sup>, Sandrine Bourrelly<sup>d</sup>

<sup>a</sup> Department of Inorganic Chemistry, Faculty of Science, P. J. Šafárik University, Moyzesova  
11, SK-041 01 Košice, Slovak Republic

<sup>b</sup> NMR laboratory, Faculty of Science, P. J. Šafárik University, Moyzesova 11, SK-041 01  
Košice, Slovak Republic

<sup>c</sup> Aix-Marseille University, CNRS, MADIREL, F-133 97 Marseille, France

\*e-mail: miroslav.almasi@upjs.sk

21 **Tables:**

22 **Table S1** A list of syntheses performed using different variations of synthetic conditions (molar  
 23 ratio, solvents, reaction temperature and reaction time).

|            | <b>Reactants</b>        | <b>Molar ratio</b> | <b>Solvent (volume ratio)</b> | <b>Volume</b>      | <b>Temp. / Time</b> | <b>Product</b> |
|------------|-------------------------|--------------------|-------------------------------|--------------------|---------------------|----------------|
| <b>1.</b>  | Zn + H <sub>4</sub> MTA | 2:1                | DMF/H <sub>2</sub> O (6:0.5)  | 6.5cm <sup>3</sup> | 80°C/120hod         | C              |
| <b>2.</b>  | Zn + H <sub>4</sub> MTA | 4:1                | DMF/H <sub>2</sub> O (6:0.5)  | 6.5cm <sup>3</sup> | 80°C/120hod         | C+P            |
| <b>3.</b>  | Zn + H <sub>4</sub> MTA | 6:1                | DMF/H <sub>2</sub> O (6:0.5)  | 6.5cm <sup>3</sup> | 80°C/120hod         | C+P            |
| <b>4.</b>  | Zn + H <sub>4</sub> MTA | 8:1                | DMF/H <sub>2</sub> O (6:0.5)  | 6.5cm <sup>3</sup> | 80°C/120hod         | C+P            |
| <b>5.</b>  | Zn + H <sub>4</sub> MTA | 8:1                | DMF/H <sub>2</sub> O (6:0.5)  | 6.5cm <sup>3</sup> | 150°C/48hod         | P              |
| <b>6.</b>  | Zn + H <sub>4</sub> MTA | 8:1                | DMF/H <sub>2</sub> O (6:0.5)  | 6.5cm <sup>3</sup> | 180°C/48hod         | D              |
| <b>7.</b>  | Zn + H <sub>4</sub> MTA | 8:1                | DMF/H <sub>2</sub> O (6:0.5)  | 6.5cm <sup>3</sup> | 200°C/48hod         | D              |
| <b>8.</b>  | Zn + H <sub>4</sub> MTA | 2:1                | DMF/H <sub>2</sub> O (6:0.5)  | 6.5cm <sup>3</sup> | 50°C/120hod         | N              |
| <b>9.</b>  | Zn + H <sub>4</sub> MTA | 8:1                | DMF/H <sub>2</sub> O (6:0.5)  | 6.5cm <sup>3</sup> | 50°C/120hod         | N              |
| <b>10.</b> | Zn + H <sub>4</sub> MTA | 2:1                | DMF/H <sub>2</sub> O (6:0.5)  | 6.5cm <sup>3</sup> | 60°C/120hod         | N              |
| <b>11.</b> | Zn + H <sub>4</sub> MTA | 8:1                | DMF/H <sub>2</sub> O (6:0.5)  | 6.5cm <sup>3</sup> | 60°C/120hod         | N              |
| <b>12.</b> | Zn + H <sub>4</sub> MTA | 2:1                | DMF/H <sub>2</sub> O (6:1)    | 7cm <sup>3</sup>   | 80°C/120hod         | P              |
| <b>13.</b> | Zn + H <sub>4</sub> MTA | 8:1                | DMF/H <sub>2</sub> O (6:1.5)  | 7.5cm <sup>3</sup> | 80°C/120hod         | P              |
| <b>14.</b> | Zn + H <sub>4</sub> MTA | 2:1                | DMA/H <sub>2</sub> O (6:1)    | 7cm <sup>3</sup>   | 80°C/120hod         | P              |
| <b>15.</b> | Zn + H <sub>4</sub> MTA | 8:1                | DMA/H <sub>2</sub> O (6:2)    | 8cm <sup>3</sup>   | 80°C/120hod         | P              |
| <b>16.</b> | Zn + H <sub>4</sub> MTA | 2:1                | DMF/H <sub>2</sub> O (6:0.5)  | 6.5cm <sup>3</sup> | 120°C/120hod        | P              |
| <b>17.</b> | Zn + H <sub>4</sub> MTA | 8:1                | DMF/H <sub>2</sub> O (6:0.5)  | 6.5cm <sup>3</sup> | 120°C/120hod        | P              |
| <b>18.</b> | Zn + H <sub>4</sub> MTA | 2:1                | DMF                           | 6.5cm <sup>3</sup> | 120°C/120hod        | P              |
| <b>19.</b> | Zn + H <sub>4</sub> MTA | 8:1                | DMF                           | 6.5cm <sup>3</sup> | 120°C/120hod        | P              |
| <b>20.</b> | Zn + H <sub>4</sub> MTA | 2:1                | DMF/H <sub>2</sub> O (6:0.5)  | 6.5cm <sup>3</sup> | 70°C/120hod         | C              |
| <b>21.</b> | Zn + H <sub>4</sub> MTA | 8:1                | DMF/H <sub>2</sub> O (6:0.5)  | 6.5cm <sup>3</sup> | 70°C/120hod         | C              |
| <b>22.</b> | Zn + H <sub>4</sub> MTA | 0.5:1              | DMF/H <sub>2</sub> O (6:0.5)  | 6.5cm <sup>3</sup> | 80°C/120hod         | N              |
| <b>23.</b> | Zn + H <sub>4</sub> MTA | 1:1                | DMF/H <sub>2</sub> O (6:0.5)  | 6.5cm <sup>3</sup> | 80°C/120hod         | C+P            |
| <b>24.</b> | Zn + H <sub>4</sub> MTA | 1.5:1              | DMF/H <sub>2</sub> O (6:0.5)  | 6.5cm <sup>3</sup> | 80°C/120hod         | C              |
| <b>25.</b> | Zn + H <sub>4</sub> MTA | 0.5:1              | DMF/EtOH/H <sub>2</sub> O     | 8.5cm <sup>3</sup> | 80°C/120hod         | P              |

|     |                          |     |                                        |                    |              |     |
|-----|--------------------------|-----|----------------------------------------|--------------------|--------------|-----|
|     |                          |     | (6:2:0.5)                              |                    |              |     |
| 26. | Zn + H <sub>4</sub> MTA  | 2:1 | DMF/EtOH/H <sub>2</sub> O<br>(6:2:0.5) | 8.5cm <sup>3</sup> | 80°C/120hod  | P   |
| 27. | Zn + H <sub>4</sub> MTA  | 8:1 | DMF/EtOH/H <sub>2</sub> O<br>(6:2:0.5) | 8.5cm <sup>3</sup> | 80°C/120hod  | P   |
| 28. | Zn + H <sub>4</sub> MTA  | 2:1 | DMF/EtOH/H <sub>2</sub> O<br>(6:2:0.5) | 8.5cm <sup>3</sup> | 120°C/120hod | P   |
| 29. | Zn + H <sub>4</sub> MTA  | 8:1 | DMF/EtOH/H <sub>2</sub> O<br>(6:2:0.5) | 8.5cm <sup>3</sup> | 120°C/120hod | P   |
|     | Zn + Na <sub>4</sub> MTA | 2:1 | DMF                                    | 6cm <sup>3</sup>   | 80°C/120hod  | P   |
| 30. | Zn + Na <sub>4</sub> MTA | 2:1 | DMA                                    | 6cm <sup>3</sup>   | 80°C/120hod  | P   |
| 31. | Zn + Na <sub>4</sub> MTA | 2:1 | H <sub>2</sub> O                       | 6cm <sup>3</sup>   | -            | X   |
| 32. | Zn + Na <sub>4</sub> MTA | 2:1 | EtOH/H <sub>2</sub> O (1:1)            | 6cm <sup>3</sup>   | -            | X   |
| 33. | Zn + Na <sub>4</sub> MTA | 2:1 | DMF/EtOH/H <sub>2</sub> O<br>(6:2:0.5) | 8.5cm <sup>3</sup> | -            | X   |
| 34. | Cd + H <sub>4</sub> MTA  | 2:1 | DMF/H <sub>2</sub> O (6:0.5)           | 6.5cm <sup>3</sup> | 80°C/120hod  | P   |
| 35. | Cd + H <sub>4</sub> MTA  | 4:1 | DMF/H <sub>2</sub> O (6:0.5)           | 6.5cm <sup>3</sup> | 80°C/120hod  | C+P |
| 36. | Cd + H <sub>4</sub> MTA  | 6:1 | DMF/H <sub>2</sub> O (6:0.5)           | 6.5cm <sup>3</sup> | 80°C/120hod  | C+P |
| 37. | Cd + H <sub>4</sub> MTA  | 8:1 | DMF/H <sub>2</sub> O (6:0.5)           | 6.5cm <sup>3</sup> | 80°C/120hod  | C   |
| 38. | Cd + H <sub>4</sub> MTA  | 8:1 | DMF/H <sub>2</sub> O (6:0.5)           | 6.5cm <sup>3</sup> | 150°C/48hod  | P   |
| 39. | Cd + H <sub>4</sub> MTA  | 8:1 | DMF/H <sub>2</sub> O (6:0.5)           | 6.5cm <sup>3</sup> | 180°C/48hod  | D   |
| 40. | Cd + H <sub>4</sub> MTA  | 8:1 | DMF/H <sub>2</sub> O (6:0.5)           | 6.5cm <sup>3</sup> | 200°C/48hod  | D   |
| 41. | Cd + H <sub>4</sub> MTA  | 2:1 | DMF/H <sub>2</sub> O (6:0.5)           | 6.5cm <sup>3</sup> | 50°C/120hod  | N   |
| 42. | Cd + H <sub>4</sub> MTA  | 8:1 | DMF/H <sub>2</sub> O (6:0.5)           | 6.5cm <sup>3</sup> | 50°C/120hod  | N   |
| 43. | Cd + H <sub>4</sub> MTA  | 2:1 | DMF/H <sub>2</sub> O (6:0.5)           | 6.5cm <sup>3</sup> | 60°C/120hod  | N   |
| 44. | Cd + H <sub>4</sub> MTA  | 8:1 | DMF/H <sub>2</sub> O (6:0.5)           | 6.5cm <sup>3</sup> | 60°C/120hod  | N   |
| 45. | Cd + H <sub>4</sub> MTA  | 2:1 | DMF/H <sub>2</sub> O (6:1)             | 7cm <sup>3</sup>   | 80°C/120hod  | P   |
| 46. | Cd + H <sub>4</sub> MTA  | 8:1 | DMF/H <sub>2</sub> O (6:1.5)           | 7.5cm <sup>3</sup> | 80°C/120hod  | P   |
| 47. | Cd + H <sub>4</sub> MTA  | 2:1 | DMA/H <sub>2</sub> O (6:1)             | 7cm <sup>3</sup>   | 80°C/120hod  | P   |
| 48. | Cd + H <sub>4</sub> MTA  | 8:1 | DMA/H <sub>2</sub> O (6:2)             | 8cm <sup>3</sup>   | 80°C/120hod  | P   |
| 49. | Cd + H <sub>4</sub> MTA  | 2:1 | DMF/H <sub>2</sub> O (6:0.5)           | 6.5cm <sup>3</sup> | 120°C/120hod | P   |
| 50. | Cd + H <sub>4</sub> MTA  | 8:1 | DMF/H <sub>2</sub> O (6:0.5)           | 6.5cm <sup>3</sup> | 120°C/120hod | P   |

|     |                          |       |                                        |                    |              |   |
|-----|--------------------------|-------|----------------------------------------|--------------------|--------------|---|
| 51. | Cd + H <sub>4</sub> MTA  | 2:1   | DMF                                    | 6.5cm <sup>3</sup> | 120°C/120hod | P |
| 52. | Cd + H <sub>4</sub> MTA  | 8:1   | DMF                                    | 6.5cm <sup>3</sup> | 120°C/120hod | P |
| 53. | Cd + H <sub>4</sub> MTA  | 2:1   | DMF/H <sub>2</sub> O (6:0.5)           | 6.5cm <sup>3</sup> | 70°C/120hod  | P |
| 54. | Cd + H <sub>4</sub> MTA  | 8:1   | DMF/H <sub>2</sub> O (6:0.5)           | 6.5cm <sup>3</sup> | 70°C/120hod  | C |
| 55. | Cd + H <sub>4</sub> MTA  | 0.5:1 | DMF/H <sub>2</sub> O (6:0.5)           | 6.5cm <sup>3</sup> | 80°C/120hod  | N |
| 56. | Cd + H <sub>4</sub> MTA  | 1:1   | DMF/H <sub>2</sub> O (6:0.5)           | 6.5cm <sup>3</sup> | 80°C/120hod  | N |
| 57. | Cd + H <sub>4</sub> MTA  | 1.5:1 | DMF/H <sub>2</sub> O (6:0.5)           | 6.5cm <sup>3</sup> | 80°C/120hod  | P |
| 58. | Cd + H <sub>4</sub> MTA  | 0.5:1 | DMF/EtOH/H <sub>2</sub> O<br>(6:2:0.5) | 8.5cm <sup>3</sup> | 80°C/120hod  | P |
| 59. | Cd + H <sub>4</sub> MTA  | 2:1   | DMF/EtOH/H <sub>2</sub> O<br>(6:2:0.5) | 8.5cm <sup>3</sup> | 80°C/120hod  | P |
| 60. | Cd + H <sub>4</sub> MTA  | 8:1   | DMF/EtOH/H <sub>2</sub> O<br>(6:2:0.5) | 8.5cm <sup>3</sup> | 80°C/120hod  | P |
| 61. | Cd + H <sub>4</sub> MTA  | 2:1   | DMF/EtOH/H <sub>2</sub> O<br>(6:2:0.5) | 8.5cm <sup>3</sup> | 120°C/120hod | P |
| 62. | Cd + H <sub>4</sub> MTA  | 8:1   | DMF/EtOH/H <sub>2</sub> O<br>(6:2:0.5) | 8.5cm <sup>3</sup> | 120°C/120hod | P |
| 63. | Cd + Na <sub>4</sub> MTA | 2:1   | DMF                                    | 6cm <sup>3</sup>   | 80°C/120hod  | P |
| 65. | Cd + Na <sub>4</sub> MTA | 2:1   | DMA                                    | 6cm <sup>3</sup>   | 80°C/120hod  | P |
| 66. | Cd + Na <sub>4</sub> MTA | 2:1   | H <sub>2</sub> O                       | 6cm <sup>3</sup>   | -            | X |
| 67. | Cd + Na <sub>4</sub> MTA | 2:1   | EtOH/H <sub>2</sub> O (1:1)            | 6cm <sup>3</sup>   | -            | X |
|     | Cd + Na <sub>4</sub> MTA | 2:1   | DMF/EtOH/H <sub>2</sub> O<br>(6:2:0.5) | 8.5cm <sup>3</sup> | -            | X |

24

25 Zn = Zn(NO<sub>3</sub>)<sub>2</sub>·6H<sub>2</sub>O, Cd = Cd(NO<sub>3</sub>)<sub>2</sub>·4H<sub>2</sub>O, H<sub>4</sub>MTA = methanetetrayltetrakis(benzene-4,1-  
26 diyl)tetrakis(aza))tetrakis(methan-1-yl-1-yliden)tetrabenzoic acid, Na<sub>4</sub>MTA = tetrasodium  
27 methanetetrayltetrakis(benzene-4,1-diyl)tetrakis(aza))tetrakis(methan-1-yl-1-yliden)  
28 tetrabenzoate, DMF = N, N'- dimethylformamide, DMA = N, N'- dimethylacetamide, EtOH =  
29 ethanol, H<sub>2</sub>O = water, C = quasi-crystal, P = powder, N = no product, D = decomposition, X =  
30 precipitate (product precipitate after mixing of the reactant solutions)

31

32

33 **Figures:**

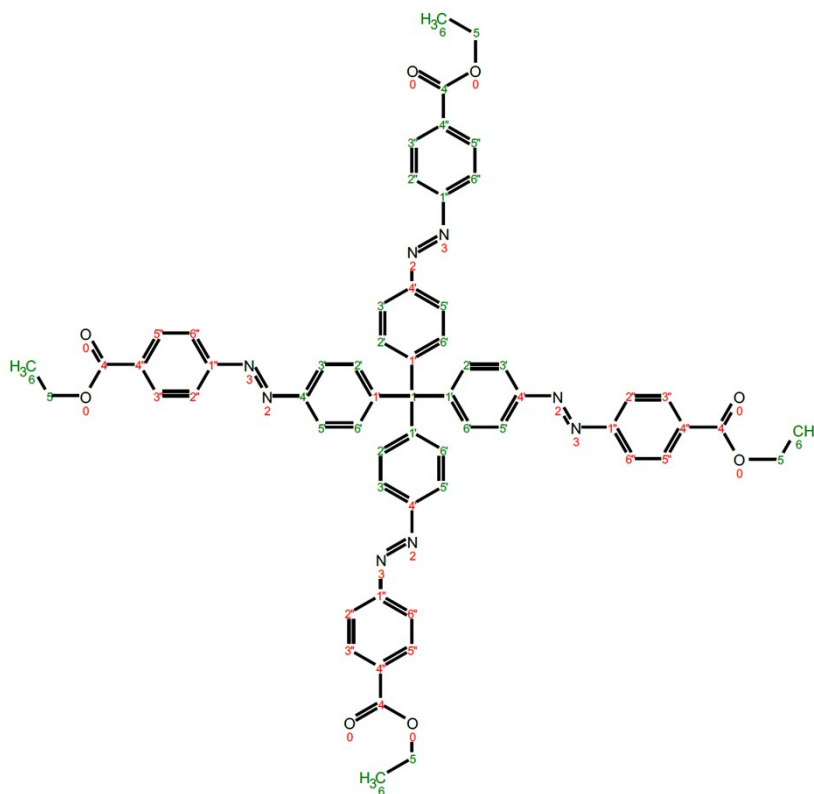

34

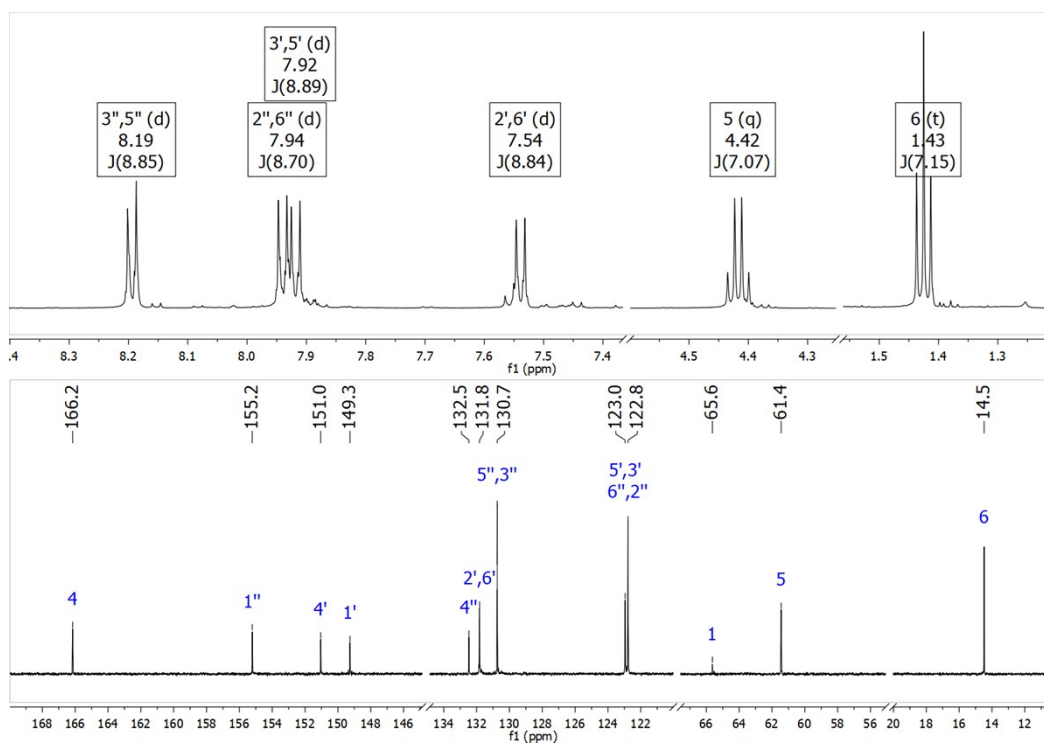

35

36 **Fig. S1** <sup>1</sup>H (600 MHz, DMSO-d<sub>6</sub>) and <sup>13</sup>C (151 MHz, DMSO-d<sub>6</sub>) NMR spectra of the

37

derivative **6**.

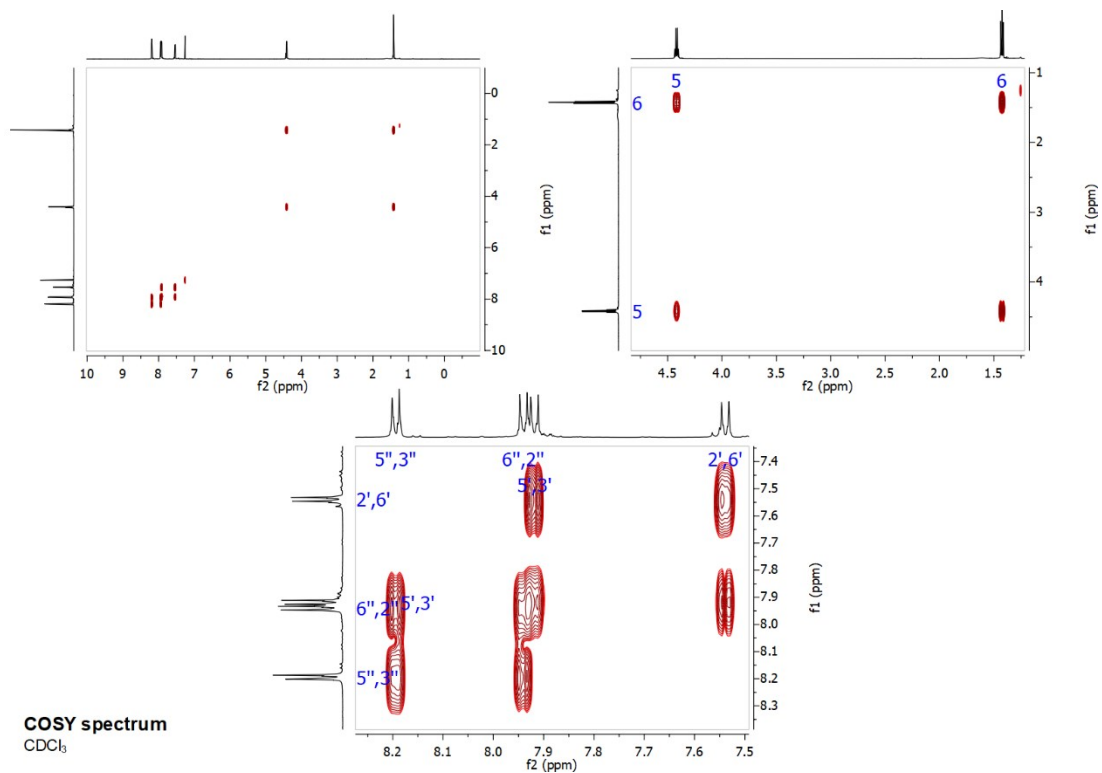

38

39

**Fig. S2**  $^1\text{H}$ ,  $^1\text{H}$ -COSY spectrum (600/600 MHz, DMSO- $d_6$ ) of the derivative **6**.

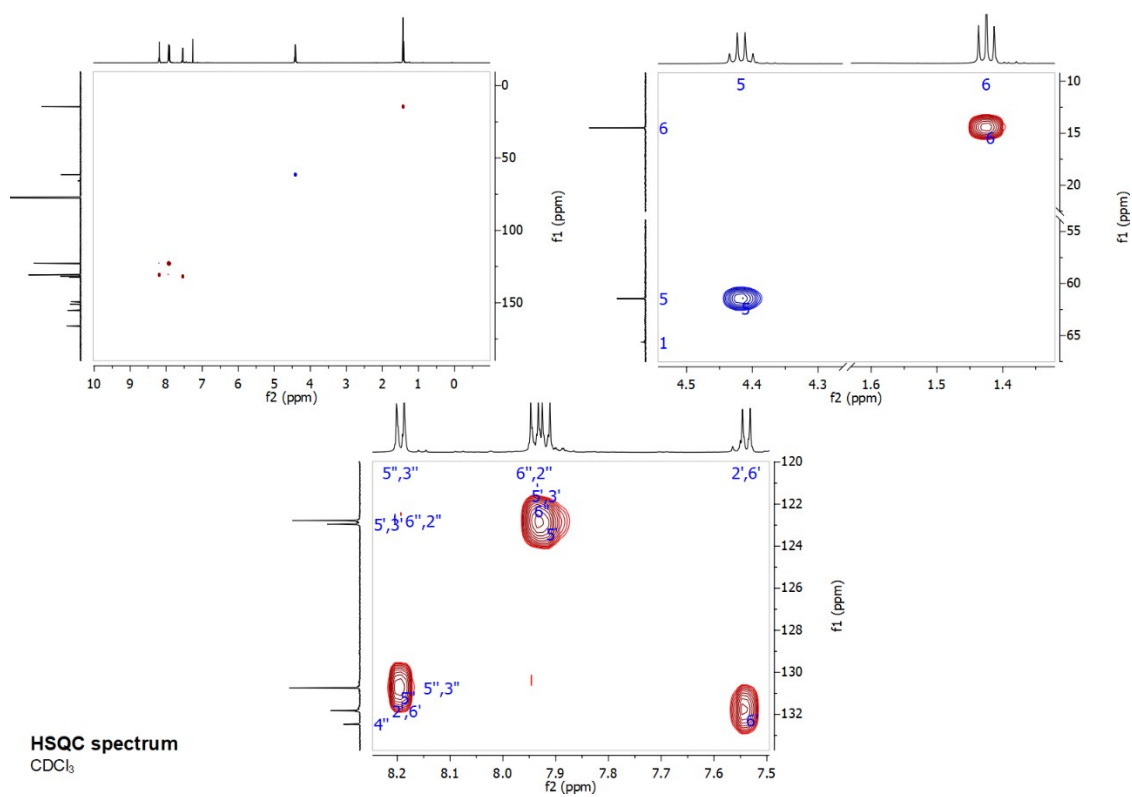

40

41

**Fig. S3**  $^1\text{H}$ ,  $^{13}\text{C}$ -HSQC spectrum (600/151 MHz, DMSO- $d_6$ ) of the derivative **6**.

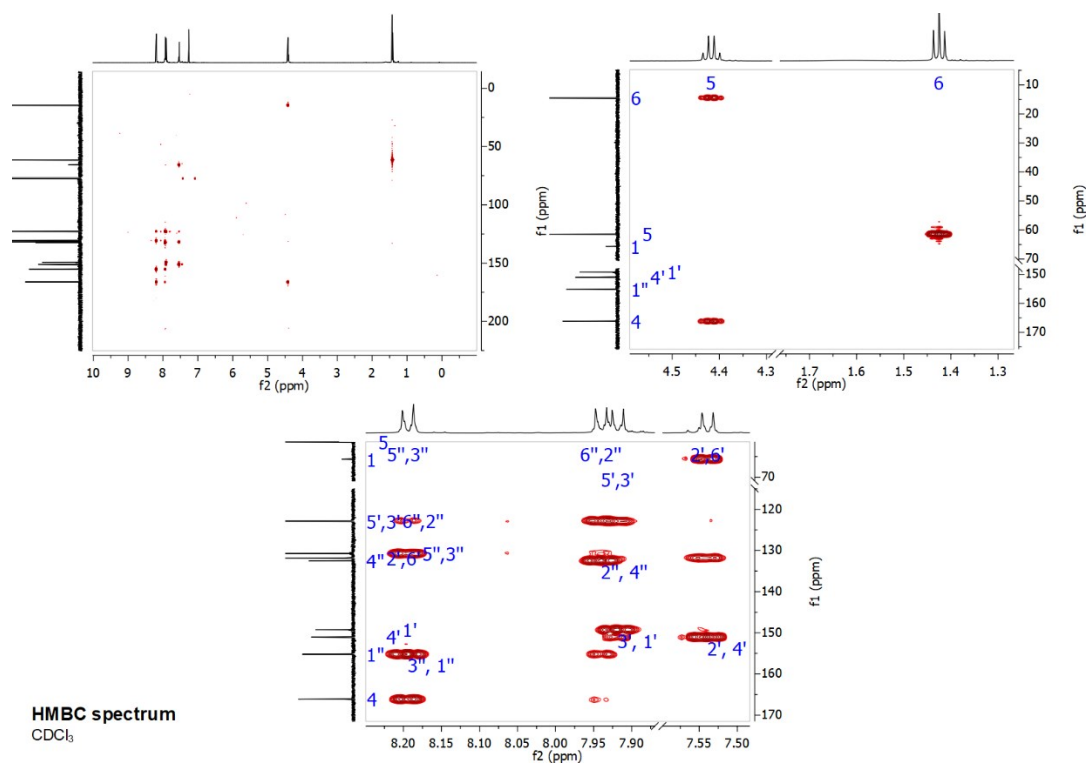

42

43 **Fig. S4**  $^1\text{H}$ ,  $^{13}\text{C}$ -HMBC spectrum (600/151 MHz,  $\text{DMSO-d}_6$ ) of the derivative 6.

44

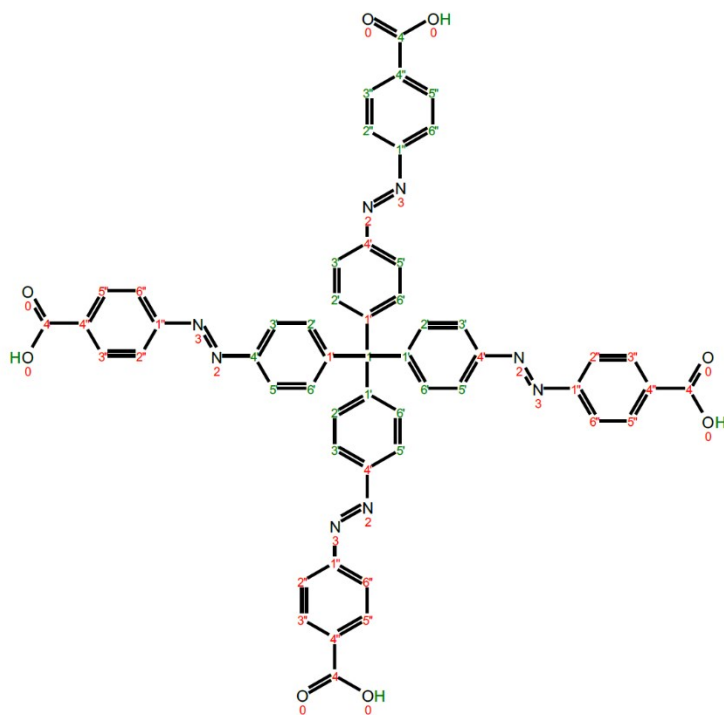

45

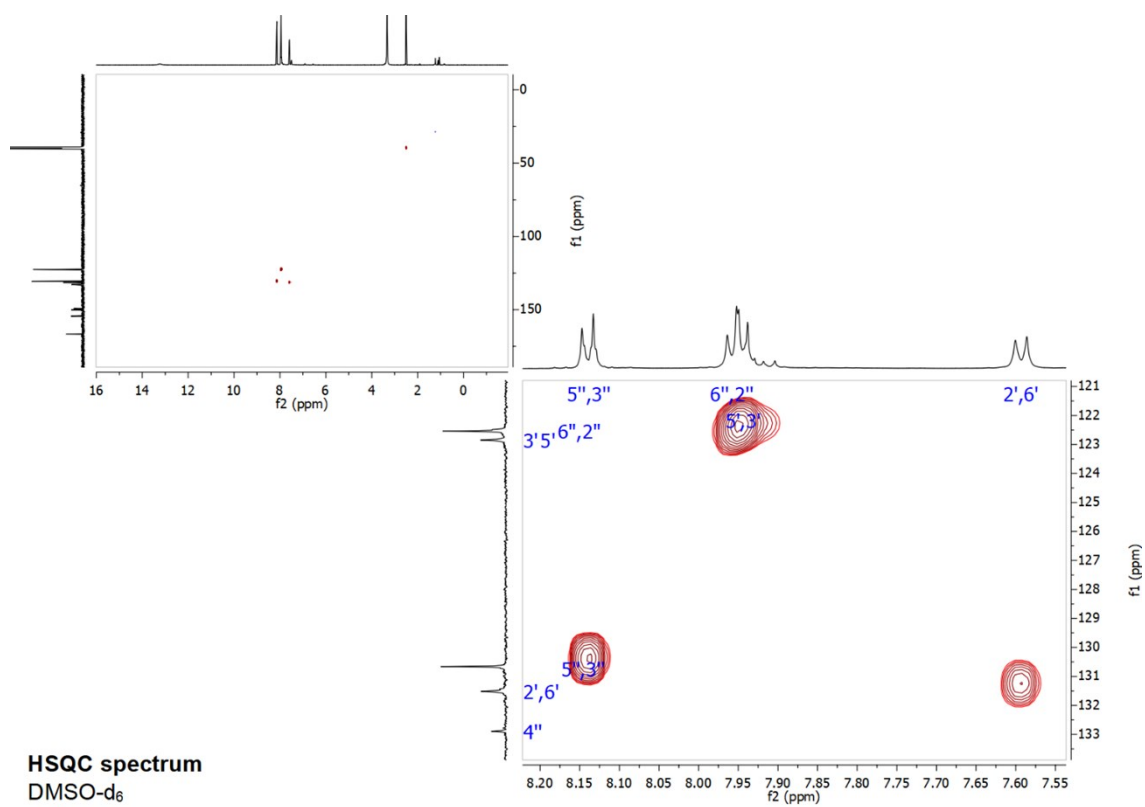

46

47 **Fig. S5**  $^1\text{H}$ ,  $^{13}\text{C}$ -HSQC spectrum (600/151 MHz, DMSO-d<sub>6</sub>) of the derivative **7**.

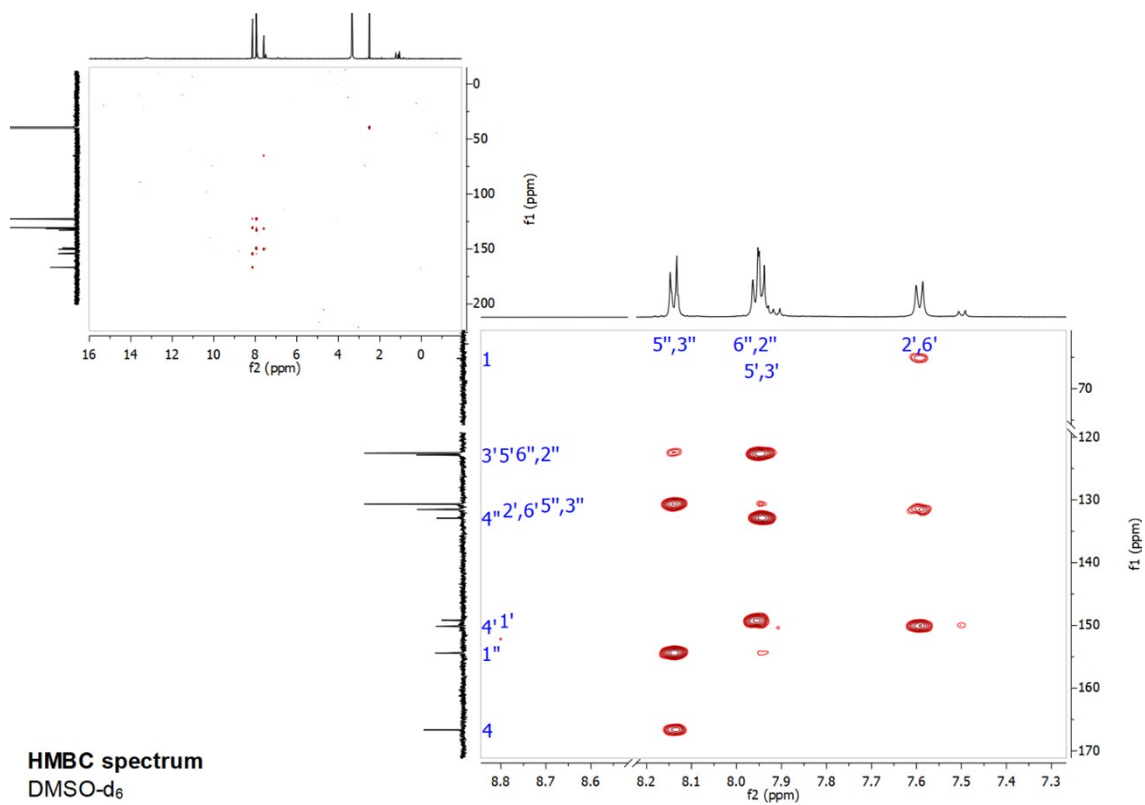

48

49 **Fig. S6**  $^1\text{H}$ ,  $^{13}\text{C}$ -HMBC spectrum (600/151 MHz, DMSO-d<sub>6</sub>) of the derivative **7**.
